# Supplementary material for: Development of bimetallic nickel-based catalysts supported on activated carbon for green fuel production
Source: Royal Society of Chemistry journal article supplement (doi:10.1039/d0ra06302a), 2020-01-01
Supplement: d0ra06302a1.pdf [file d0ra06302a1.pdf]

**Development of Bimetallic Nickel Based Catalyst Supported on Activated Carbon for  
Green Fuel Production**

Wan Nor Adira Wan Khalit <sup>a,b,c</sup>, Tengku Sharifah Marliza<sup>a,c\*</sup>, N. Asikin-Mijan<sup>d</sup>, M. Safa Gamal<sup>a,b</sup>,  
Mohd Izham Saiman <sup>a,b</sup>, Mohd Lokman Ibrahim<sup>e,f</sup> and Y. H. Taufiq-Yap <sup>a,b,g\*</sup>

## List of Supplementary Materials

**Figure S1** The elemental surface analysis for NiW/AC catalyst

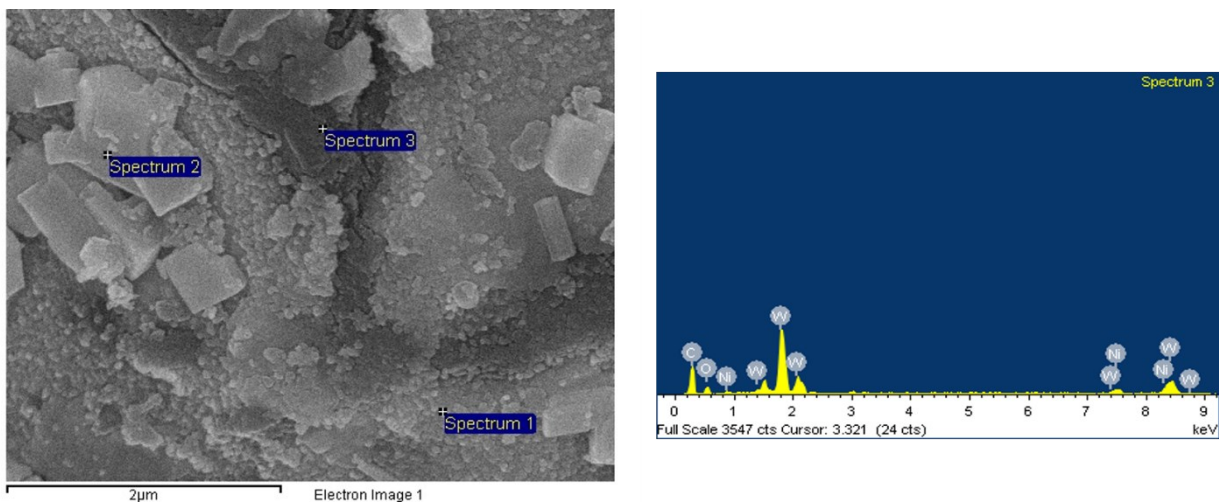

**Fig. S1** The elemental surface analysis for NiW/AC catalyst.
